# Supplementary material for: The TAM receptor tyrosine kinases Axl and Mer drive the maintenance of highly phagocytic macrophages
Source: Front Immunol. 2022 Jul 29;13:960401. doi: 10.3389/fimmu.2022.960401 (PMC9373726; doi:10.3389/fimmu.2022.960401)
Supplement: Supplementary Table 1 — Antibodies. [file Table_1.xlsx]

## Sheet: Antibodies
Flow cytomety
Target	Conjugate	Clone	Isotype	Source	Catalog number
TCRβ	APC	H57-597	ArmHams IgG	eBiosciences	Cat #: 17-5961-81
CD4	PerCP/Cyanine5.5	GK1.5	Rat IgG2b,k	Biolegend	Cat #: 100434
CD8a	Alexa Fluor 488	53-6.7	Rat IgG2a,k	Biolegend	Cat #: 100723
CD8a	APC/Cyanine7	53-6.7	Rat IgG2a,k	Biolegend	Cat #: 100714
Foxp3	PE	FJK-16s	Rat IgG2a, k	eBiosciences	Cat #: 12-5773-82
CD11b	FITC	M1/70	Rat IgG2b,k	eBiosciences	Cat #: 11-0112-82
F4/80	PerCP/Cyanine5.5	BM8	Rat IgG2a, k	Biolegend	Cat #: 123128
F4/80	APC	BM8	Rat IgG2a, k	Biolegend	Cat#: 123115
CD163	APC	TNKUPJ	Rat IgG2a, k	eBiosciences	Cat #: 17-1631-82
CD11c	FITC	N418	ArmHams IgG	Biolegend	Cat #: 117306
B220	PerCP/Cyanine5.5	RA3-6B2	Rat IgG2a, κ	Biolegend	Cat #: 103236
SIRPa	PE/Cyanine7	P84	Rat IgG1, k	Biolegend	Cat #: 144008
VCAM-1 (CD106)	PE/Cyanine7	428 (MVCAM.A)	Rat IgG2a, k	Biolegend	Cat #: 105720
TIM-4	PE	RTM4-54	Rat IgG2a, k	Biolegend	Cat #: 130005
Ki67	PE/Cyanine7	SolA15	Rat IgG2a, k	eBiosciences	Cat #: 25-5698-80
Mer	APC	DS5MMER	Rat IgG2a, κ	eBiosciences	Cat #: 17-5751-82
Axl	PE	MAXL8DS	Rat IgG2a, κ	eBiosciences	Cat #: 12-1084-82
TruStain FcX (CD16/CD32)		93	Rat IgG2a, λ	Biolegend	Cat #: 101320
Immunohistochemistry
Target	Conjugate	Clone	Isotype	Source	Catalog number
Axl		polyclonal	Goat IgG	R&D	Cat #: AF854
Axl (H-124)		polyclonal	Rabbit IgG	Santa Cruz	Cat#: sc-20741
Mer		polyclonal	Goat IgG	R&D	Cat #: AF591
Mer		DS5MMER	Rat IgG2a, κ	eBiosciences	Cat #: 14-5751-82
Gas6		polyclonal	Goat IgG	R&D	Cat #: AF986
K5		polyclonal	Rabbit IgG	Biolegend	Cat #: 905503
Cleaved Caspase-3 (Asp175)		polyclonal	Rabbit	Cell Signaling	Cat #: 9661
CD169		3D6.112	Rat IgG2a	Bio Rad	Cat #: MCA884
F4/80	Alexa Fluor 647	CI:A3-1	Rat IG2b	Bio Rad	Cat #: MCA497A647F
CD11b	FITC	M1/70	Rat IgG2b,k	eBiosciences	Cat #: 11-0112-82
CD11c	FITC	N418	ArmHams IgG	Biolegend	Cat #: 117306
CD163	APC	TNKUPJ	Rat IgG2a, k	eBiosciences	Cat #: 17-1631-82
anti-Goat	Alexa fluor 546	polyclonal	Donkey/IgG	Invitrogen	Cat #: A-11056
anti-Goat	Alexa fluor 488	polyclonal	Donkey/IgG	Invitrogen	Cat #: A-11055
anti-Rat	Cy3	polyclonal	Donkey/IgG	Jackson ImmunoResearch	Cat #: 712-165-153
anti-Rat	Alexa Fluor 488	polyclonal	Donkey/IgG	Jackson ImmunoResearch	Cat #: 712-545-153
anti-Rat	Alexa Fluor 647	polyclonal	Donkey/IgG	Jackson ImmunoResearch	Cat #: 712-606-153
anti-Rabbit	Alexa Fluor 546	polyclonal	Donkey/IgG	Invitrogen	Cat #: A-10040
Western Blot
Target	Conjugate	Clone	Isotype	Source	Catalog number
Axl		polyclonal	Goat IgG	R&D	Cat #: AF854
Mer		DS5MMER	Rat IgG2a, κ	eBiosciences	Cat #: 14-5751-82
Cleaved Caspase-3 (Asp175)		polyclonal	Rabbit	Cell Signaling	Cat #: 9661
Caspase3		polyclonal	Rabbit	Cell Signaling	Cat #: 9662
GAPDH		6C5	Mouse	Santa Cruz	Cat #: sc-32233
anti-Goat	Horseradish Peroxidase	polyclonal	Donkey/IgG	Jackson ImmunoResearch	Cat #: 705-035-003
anti-Rat	Horseradish Peroxidase	polyclonal	Goat/IgG	Jackson ImmunoResearch	Cat #: 112-035-143
anti-Mouse	Horseradish Peroxidase	polyclonal	Goat/IgG	Jackson ImmunoResearch	Cat #: 115-036-062
anti-Rabbit	Horseradish Peroxidase	polyclonal	Goat/IgG	Jackson ImmunoResearch	Cat #: 111-036-047
